# Supplementary material for: Twelve-year persistence of inequalities in antenatal care utilisation among women in Tanzania: a decomposition analysis of population-based cross-sectional surveys
Source: HighWire-hosted journal article supplement (doi:10.1136/bmjopen-2020-040450), 2021-04-01
Supplement: bmjopen-2020-040450supp003_data_supplement.pdf [file bmjopen-2020-040450supp003_data_supplement.pdf]

**Supplementary Table 3 Contributing factors to socioeconomic inequalities in accessing adequate ANC**

| Variable                        | 2004           |               |              | 2010           |               |              | 2016           |               |              |
|---------------------------------|----------------|---------------|--------------|----------------|---------------|--------------|----------------|---------------|--------------|
|                                 | Concentr Index | Contribution  |              | Concentr Index | Contribution  |              | Concentr Index | Contribution  |              |
|                                 |                | Absolute      | %            |                | Absolute      | %            |                | Absolute      | %            |
| Maternal age (ref. 15 – 19)     |                |               |              |                |               |              |                |               |              |
| 20 – 24                         | 0.0124         | -0.0009       | -0.36        | 0.0113         | 0.0001        | 0.05         | 0.0013         | 0.0000        | 0.01         |
| 25 – 29                         | 0.0557*        | -0.0062       | -2.52        | 0.0552         | 0.0017        | 0.69         | 0.0699         | 0.0022        | 0.94         |
| 30 – 34                         | 0.0248**       | -0.0026       | -1.08        | 0.0589         | 0.0023        | 0.94         | 0.0618         | 0.0014        | 0.60         |
| 35 – 39                         | -0.0386*       | 0.0021        | 0.88         | -0.1048        | -0.0040       | -1.62        | 0.0117         | 0.0001        | 0.04         |
| 40 – 44                         | -0.1576*       | 0.0043        | 1.78         | -0.1282        | -0.0020       | -0.79        | -0.1676        | -0.0018       | -0.74        |
| 45 – 49                         | -0.2944**      | 0.0046        | 1.87         | -0.2141        | -0.0010       | -0.39        | -0.1967        | -0.0005       | -0.20        |
| <b>Subtotal</b>                 |                | 0.0013        | 0.57         |                | -0.0029       | -1.12        |                | 0.0014        | 0.65         |
| Wealth index (ref. Lowest)      |                |               |              |                |               |              |                |               |              |
| Second                          | -0.3779        | -0.0014       | -0.57        | -0.3903        | 0.0034        | 1.37         | -0.3723        | -0.0051       | -2.17        |
| Third                           | 0.0340         | -0.0006       | -0.24        | 0.0428         | 0.0006        | 0.25         | 0.0204***      | 0.0008        | 0.32         |
| Fourth                          | 0.4339         | 0.0086        | 3.51         | 0.4579***      | 0.0436        | 17.65        | 0.4134***      | 0.0307        | 12.94        |
| Highest                         | 0.8146***      | 0.1171        | 48.02        | 0.8305**       | 0.0582        | 23.56        | 0.8076***      | 0.0930        | 39.24        |
| <b>Subtotal</b>                 |                | <b>0.1237</b> | <b>50.72</b> |                | <b>0.1058</b> | <b>42.83</b> |                | <b>0.1194</b> | <b>50.33</b> |
| Residence (ref. Rural)          |                |               |              |                |               |              |                |               |              |
| Urban                           | -0.1764**      | 0.0684        | 28.02        | -0.1884***     | 0.0909        | 36.79        | -0.2398***     | 0.0619        | 26.13        |
| <b>Subtotal</b>                 |                | <b>0.0684</b> | <b>28.02</b> |                | <b>0.0909</b> | <b>36.79</b> |                | <b>0.0619</b> | <b>26.13</b> |
| Maternal education (ref. None)  |                |               |              |                |               |              |                |               |              |
| Primary                         | 0.0618***      | 0.0138        | 5.64         | 0.0391**       | 0.0043        | 1.76         | -0.0217***     | -0.0032       | -1.35        |
| Secondary                       | 0.6666**       | 0.0202        | 8.29         | 0.6452**       | 0.0225        | 9.10         | 0.4869***      | 0.0305        | 12.86        |
| Higher                          | 0.9008         | 0.0046        | 1.89         | 0.9705         | 0.0002        | 0.08         | 0.8804         | 0.0026        | 1.10         |
| <b>Subtotal</b>                 |                | <b>0.0386</b> | <b>15.82</b> |                | <b>0.0270</b> | <b>10.94</b> |                | <b>0.0299</b> | <b>12.61</b> |
| Marital status (ref. No spouse) |                |               |              |                |               |              |                |               |              |
| Living with spouse              | -0.0086        | 0.0001        | 0.06         | -0.0022        | 0.0001        | 0.05         | -.0242         | .0007         | 0.28         |
| <b>Subtotal</b>                 |                | <b>0.0001</b> | <b>0.06</b>  |                | <b>0.0001</b> | <b>0.05</b>  |                | <b>.0007</b>  | <b>0.28</b>  |
| Employment (ref. Not employed)  |                |               |              |                |               |              |                |               |              |
| Employed                        | 0.2137         | 0.0086        | 3.53         | 0.2262**       | 0.0182        | 7.36         | 0.1792*        | 0.0073        | 3.09         |

|                 |         |               |             |         |               |              |            |               |             |
|-----------------|---------|---------------|-------------|---------|---------------|--------------|------------|---------------|-------------|
|                 |         | 0.0086        | 3.53        |         | 0.0182        | 7.36         |            | 0.0073        | 3.09        |
| Region-effects  | -0.0132 | 0.0032        | 1.29        | -0.0007 | -0.0000       | -0.02        | -0.0331*** | 0.0076        | 3.21        |
| <b>Subtotal</b> |         | <b>0.0032</b> | <b>1.29</b> |         | <b>0.0000</b> | <b>-0.02</b> |            | <b>0.0076</b> | <b>3.21</b> |
| Residual        |         | -.00002       | -0.01       |         | .00789        | 3.19         |            | .00874        | 3.69        |
